# Supplementary material for: Features and outcomes of bailout repeat transcatheter aortic valve implantation (TAVI): the Bailout Acute TAVI-in-TAVI to Lessen Events (BATTLE) international registry
Source: Springer Nature journal article supplement (doi:10.1007/s00392-023-02239-8), 2023-06-09

**Features and outcomes of bailout repeat transcatheter aortic valve implantation (TAVI): evidence from the Bailout Acute TAVI-in-TAVI to Lessen Events (BATTLE) international registry**

**Online supplement**

**Table 1S.** Baseline imaging features. TAVI=transcatheter aortic valve implantation.

| Features                                     | Control     | TAVI-in-TAVI | P value |
|----------------------------------------------|-------------|--------------|---------|
| Patients                                     | 212         | 106          | -       |
| Aortic valve area (cm <sup>2</sup> )         | 0.66±0.21   | 0.69±0.25    | 0.298   |
| Peak aortic valve gradient (mm Hg)           | 79±25       | 78±77        | 0.782   |
| Mean aortic valve gradient (mm Hg)           | 49±17       | 48±18        | 0.754   |
| Bicuspid aortic valve                        | 9 (4.3%)    | 4 (3.8%)     | 1       |
| Significant aortic valve calcification       | 111 (52.4%) | 76 (71.7%)   | 0.001   |
| Aortic regurgitation                         |             |              | 0.161   |
| None or trivial                              | 151 (71.2%) | 77 (72.6%)   |         |
| Mild                                         | 44 (20.8%)  | 18 (17.0%)   |         |
| Moderate                                     | 16 (7.6%)   | 7 (6.6%)     |         |
| Moderate to severe                           | 1 (0.5%)    | 4 (3.8%)     |         |
| Maximum aortic anulus diameter (mm)          | 26±4        | 26±4         | 0.840   |
| Sinus of Valsalva diameter (mm)              | 31±4        | 33±4         | 0.014   |
| Sino-tubular junction diameter (mm)          | 28±3        | 30±5         | 0.008   |
| Ascending aortic diameter (mm)               | 34±5        | 36±5         | 0.014   |
| Porcelain aorta                              | 1 (0.5%)    | 0            | 1       |
| Left ventricular end-diastolic diameter (mm) | 48±7        | 49±9         | 0.179   |
| Left ventricular end-systolic diameter (mm)  | 34±9        | 34±9         | 0.812   |
| Septal thickness (mm)                        | 14±3        | 14±3         | 0.401   |
| Posterior wall thickness (mm)                | 13±2        | 12±2         | 0.149   |
| Left ventricular ejection fraction (%)       | 55±11       | 53±13        | 0.314   |
| Left ventricular outflow diameter (mm)       | 20±3        | 20±3         | 0.351   |
| Low flow-low gradient aortic stenosis        | 7 (3.3%)    | 10 (9.4%)    | 0.032   |
| Mitral regurgitation                         |             |              | 0.971   |
| None or trivial                              | 34 (16.0%)  | 15 (14.2%)   |         |
| Mild                                         | 101 (47.6%) | 54 (50.9%)   |         |
| Moderate                                     | 69 (32.6%)  | 34 (32.1%)   |         |
| Moderate to severe                           | 4 (1.9%)    | 1 (0.9%)     |         |
| Severe                                       | 4 (1.9%)    | 2 (1.9%)     |         |
| Systolic pulmonary artery pressure (mm Hg)   | 43±13       | 42±11        | 0.514   |

**Table 2S.** Reasons for TAVI-in-TAVI. TAVI=transcatheter aortic valve implantation.

| <b>Features</b>                                       | <b>Count</b> | <b>%</b> |
|-------------------------------------------------------|--------------|----------|
| Cranial embolization                                  | 10           | 9.4%     |
| Low implantation                                      | 3            | 2.8%     |
| Significant aortic regurgitation or paravalvular leak | 9            | 8.5%     |
| Not reported                                          | 84           | 79.3%    |

**Table 3S.** Devices used for TAVI-in-TAVI. TAVI=transcatheter aortic valve implantation.

|              |                  | Second device |              |            |               |              |              |                  |              |
|--------------|------------------|---------------|--------------|------------|---------------|--------------|--------------|------------------|--------------|
|              |                  | Acurate       | Allegra      | CoreValve  | Evolut        | Jena Valve   | Myval        | Portico/ Navitor | Sapien       |
| First device | Accurate         | 4<br>(30.8%)  | 0            | 0          | 3<br>(23.1%)  | 0            | 0            | 0                | 6<br>(46.2%) |
|              | Allegra          | 0             | 3<br>(60.0%) | 0          | 2<br>(40.0%)  |              | 0            | 0                | 0            |
|              | CoreValve        | 0             | 0            | 36 (97.3%) | 1<br>(2.7%)   | 0            | 0            | 0                | 0            |
|              | Evolut           | 0             | 0            | 1 (3.5%)   | 24<br>(82.8%) | 0            | 0            | 0                | 4<br>(13.8%) |
|              | Jena Valve       | 0             | 0            | 0          | 0             | 1<br>(50.0%) | 0            | 0                | 1<br>(50.0%) |
|              | Myval            | 0             | 0            | 0          | 0             | 0            | 2<br>(100%)  | 0                | 0            |
|              | Portico/ Navitor | 0             | 0            | 0          | 0             | 0            | 1<br>(11.1%) | 7 (77.8%)        | 1<br>(11.1%) |
|              | Sapien           | 0             | 0            | 1 (11.1%)  | 0             | 0            | 0            | 0                | 8<br>(88.9%) |

**Table 4S.** Postprocedural and inhospital outcomes. TAVI=transcatheter aortic valve implantation.

| Features                                   | Control     | TAVI-in-TAVI | P value |
|--------------------------------------------|-------------|--------------|---------|
| Patients                                   | 212         | 106          | -       |
| Postprocedural echocardiogram              |             |              |         |
| Peak aortic valve gradient (mm Hg)         | 17±11       | 14±8         | 0.064   |
| Mean aortic valve gradient (mm Hg)         | 9±5         | 8±5          | 0.085   |
| Aortic regurgitation                       |             |              | 0.196   |
| None or trivial                            | 122 (60.4%) | 57 (55.3%)   |         |
| Mild                                       | 66 (32.7%)  | 34 (33.0%)   |         |
| Moderate                                   | 1 (0.5%)    | 4 (4.9%)     |         |
| Moderate to severe                         | 1 (0.5%)    | 0            |         |
| Mitral regurgitation                       |             |              | 0.464   |
| None or trivial                            | 87 (54.4%)  | 37 (43.0%)   |         |
| Mild                                       | 50 (31.3%)  | 32 (37.2%)   |         |
| Moderate                                   | 16 (10.0%)  | 11 (12.8%)   |         |
| Moderate to severe                         | 5 (3.1%)    | 4 (4.7%)     |         |
| Severe                                     | 2 (1.3%)    | 2 (2.3%)     |         |
| Discharge echocardiogram                   |             |              |         |
| Peak aortic valve gradient (mm Hg)         | 17±9        | 16±8         | 0.318   |
| Mean aortic valve gradient (mm Hg)         | 9±5         | 9±5          | 0.305   |
| Aortic regurgitation                       |             |              | 0.112   |
| None or trivial                            | 116 (55.5%) | 51 (56.7%)   |         |
| Mild                                       | 79 (37.8%)  | 29 (32.2%)   |         |
| Moderate                                   | 14 (6.7%)   | 7 (7.8%)     |         |
| Moderate to severe                         | 0           | 2 (2.2%)     |         |
| Severe                                     | 0           | 1 (1.1%)     |         |
| Mitral regurgitation                       |             |              | 0.720   |
| None or trivial                            | 24 (14.1%)  | 7 (8.8%)     |         |
| Mild                                       | 98 (57.7%)  | 48 (60.0%)   |         |
| Moderate                                   | 37 (21.8%)  | 19 (23.8%)   |         |
| Moderate to severe                         | 7 (4.1%)    | 5 (6.3%)     |         |
| Severe                                     | 4 (2.4%)    | 1 (1.3%)     |         |
| Systolic pulmonary artery pressure (mm Hg) | 40±13       | 40±11        | 0.803   |
| Hospital stay (days)                       | 6±6         | 7±6          | 0.153   |
| Inhospital outcomes                        |             |              |         |
| Death                                      | 3 (1.4%)    | 16 (15.1%)   | <0.001  |
| Myocardial infarction                      | 1 (0.5%)    | 1 (0.9%)     | 1       |
| Stroke                                     | 3 (1.4%)    | 3 (2.8%)     | 0.404   |
| Access site complication                   | 33 (15.6%)  | 17 (16.0%)   | 1       |
| Bleeding                                   | 43 (20.3%)  | 27 (25.5%)   | 0.316   |
| Significant coronary obstruction           | 3 (1.4%)    | 0            | 0.553   |
| Major bleeding                             | 23 (10.9%)  | 15 (14.2%)   | 0.463   |
| Emergency surgery                          | 1 (0.5%)    | 4 (3.8%)     | 0.044   |
| Pacemaker implantation                     | 20 (9.4%)   | 23 (21.7%)   | 0.005   |
| Tamponade                                  | 3 (1.4%)    | 5 (4.7%)     | 0.123   |
| Major adverse event*                       | 48 (22.6%)  | 41 (38.7%)   | 0.003   |

\*composite of death, myocardial infarction, stroke, major bleeding, or reintervention

**Table 5S.** Follow-up assessments. TAVI=transcatheter aortic valve implantation.

| Features                                   | Control    | TAVI-in-TAVI | P value |
|--------------------------------------------|------------|--------------|---------|
| 1-month follow-up                          |            |              |         |
| Patients                                   | 110        | 64           | -       |
| New York Heart Association                 |            |              | 0.643   |
| I                                          | 58 (52.7%) | 32 (50.0%)   |         |
| II                                         | 40 (36.4%) | 28 (43.8%)   |         |
| III                                        | 10 (9.1%)  | 4 (6.3%)     |         |
| IV                                         | 2 (1.8%)   | 0            |         |
| Peak aortic valve gradient (mm Hg)         | 18±10      | 16±9         | 0.326   |
| Mean aortic valve gradient (mm Hg)         | 10±5       | 9±5          | 0.194   |
| Aortic regurgitation                       |            |              | 0.829   |
| None or trivial                            | 43 (49.4%) | 29 (53.7%)   |         |
| Mild                                       | 34 (39.1%) | 18 (33.3%)   |         |
| Moderate                                   | 10 (11.5%) | 7 (13.0%)    |         |
| Moderate to severe                         | 0          | 0            |         |
| Mitral regurgitation                       |            |              | 0.638   |
| None or trivial                            | 9 (12.2%)  | 8 (15.7%)    |         |
| Mild                                       | 43 (58.1%) | 27 (52.9%)   |         |
| Moderate                                   | 14 (18.9%) | 11 (21.6%)   |         |
| Moderate to severe                         |            |              |         |
| Severe                                     |            |              |         |
| Systolic pulmonary artery pressure (mm Hg) | 40±16      | 39±17        | 0.635   |
| 12-month follow-up                         |            |              |         |
| Patients                                   | 127        | 61           | -       |
| New York Heart Association                 |            |              | 0.774   |
| I                                          | 55 (43.3%) | 28 (45.9%)   |         |
| II                                         | 54 (42.5%) | 28 (45.9%)   |         |
| III                                        | 14 (11.0%) | 4 (6.6%)     |         |
| IV                                         | 4 (3.2%)   | 1 (1.6%)     |         |
| Peak aortic valve gradient (mm Hg)         | 19±9       | 18±9         | 0.615   |
| Mean aortic valve gradient (mm Hg)         | 10±6       | 10±5         | 0.436   |
| Aortic regurgitation                       |            |              | 0.790   |
| None or trivial                            | 31 (40.3%) | 19 (37.3%)   |         |
| Mild                                       | 36 (46.8%) | 27 (52.9%)   |         |
| Moderate                                   | 10 (13.0%) | 5 (9.8%)     |         |
| Moderate to severe                         | 0          | 0            |         |
| Mitral regurgitation                       |            |              | 0.722   |
| None or trivial                            | 9 (11.4%)  | 8 (16.0%)    |         |
| Mild                                       | 48 (60.8%) | 28 (56.0%)   |         |
| Moderate                                   | 19 (24.1%) | 11 (22.0%)   |         |
| Moderate to severe                         | 2 (2.5%)   | 3 (6.0%)     |         |
| Severe                                     | 1 (1.3%)   | 0            |         |
| Systolic pulmonary artery pressure (mm Hg) | 40±12      | 39±13        | 0.722   |

**Table 6S.** Long-term outcomes censoring events occurring <1 month. TAVI=transcatheter aortic valve implantation.

| <b>Features</b>             | <b>Control</b> | <b>TAVI-in-TAVI</b> | <b>P value</b> |
|-----------------------------|----------------|---------------------|----------------|
| Patients                    | 137            | 62                  | -              |
| Follow-up (months)          | 2.8±2.4        | 3.0±2.5             | 0.583          |
| Death                       | 68 (37.8%)     | 35 (44.9%)          | 0.333          |
| Cardiovascular death        | 41 (22.8%)     | 15 (19.2%)          | 0.623          |
| Myocardial infarction       | 5 (4.0%)       | 1 (2.1%)            | 1              |
| Stroke                      | 10 (7.9%)      | 2 (4.3%)            | 0.517          |
| Bleeding                    | 0              | 1 (2.1%)            | 0.272          |
| Major bleeding              | 0              | 0                   | -              |
| Aortic valve reintervention | 1 (0.8%)       | 0                   | 1              |
| Major adverse event*        | 49 (38.9%)     | 19 (40.4%)          | 0.863          |

\*composite of death, myocardial infarction, stroke, major bleeding, or aortic valve reintervention

**Table 7S.** Unadjusted, adjusted and inverse probability of treatment weighted analyses for death and major adverse event. HR=hazard ratio; OR=odds ratio; TAVI=transcatheter aortic valve implantation.

| Features                                    | Unadjusted analysis            | Adjusted analysis*              | Inverse probability of treatment weighted analysis |
|---------------------------------------------|--------------------------------|---------------------------------|----------------------------------------------------|
| Inhospital                                  |                                |                                 |                                                    |
| Death                                       | OR=12.39 (3.52-43.56), p<0.001 | OR=16.24 (2.01-131.44), p=0.009 | OR=10.45 (4.19-26.03), p<0.001                     |
| Major adverse event                         | OR=2.16 (1.30-3.58), p=0.003   | OR=2.34 (1.26-4.36), p=0.007    | OR=2.10 (1.44-3.05), p<0.001                       |
| Cumulative at long-term                     |                                |                                 |                                                    |
| Death                                       | HR=1.55 (1.09-2.20), p=0.015   | HR=1.93 (1.19-3.12), p=0.007    | HR=1.37 (1.04- 1.81), p=0.025                      |
| Major adverse event                         | HR=1.46 (1.07-1.99), p=0.018   | HR=1.80 (1.19- 2.72), p=0.005   | HR=1.38 (1.10- 1.74), p=0.005                      |
| At long-term after censoring 1-month events |                                |                                 |                                                    |
| Death                                       | HR=1.15 (0.76-1.72), p=0.513   | HR=1.68 (0.96- 2.93), p=0.068   | HR=1.02 (0.75-1.39), p=0.897                       |
| Major adverse event                         | HR=1.18 (0.69-2.01), p=0.548   | HR=1.97 (0.75-5.19), p=0.171    | HR=1.11 (0.71-1.73), p=0.645                       |

\*adjusting for age, gender, body mass index, diagnosis, logistic EuroSCORE, EuroSCORE II, baseline New York Heart Association, approach, use of a balloon-expandable valve, and postdilatation; OR or HR <1 favor TAVI-in-TAVI, OR or HR >1 favor control.

**Figure 1S.** Cumulative failure curves for death (top) and major adverse event (bottom). TAVI=transcatheter aortic valve implantation.

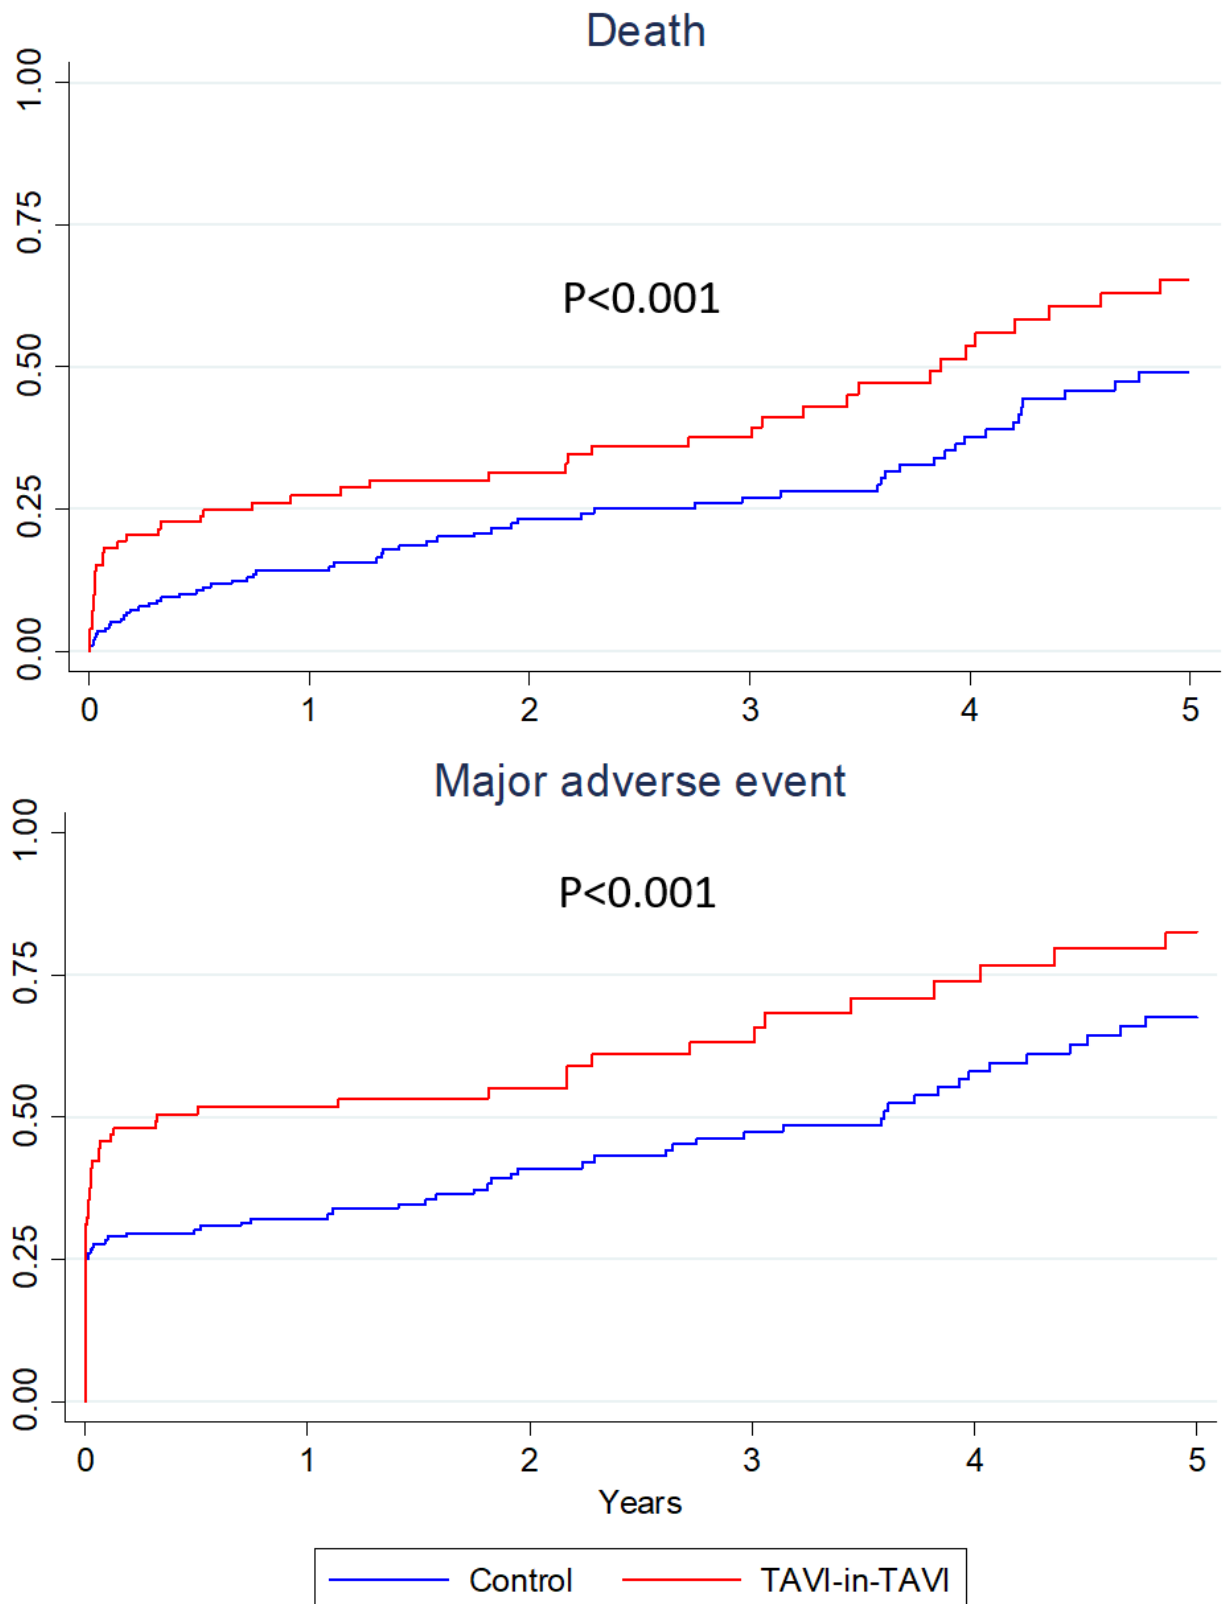

Supplement: MOESM1 [file 392_2023_2239_MOESM1_ESM.pdf]
